# Supplementary material for: Is ultrasound-guided lavage an effective intervention for rotator cuff calcific tendinopathy? A systematic review with a meta-analysis of randomised controlled trials
Source: PubMed Central journal article supplement — BMJ Open Sport Exerc Med. 2019 Mar 9;5(1):e000506. doi: 10.1136/bmjsem-2018-000506 (PMC6539165; doi:10.1136/bmjsem-2018-000506), 2019-03-09
Supplement: bmjsem-2018-000506supp001.pdf [file bmjsem-2018-000506supp001.pdf]

# Supplement materials

Is ultrasound-guided lavage an effective intervention for rotator cuff calcific tendinopathy? A systematic review with a meta-analysis of randomized controlled trials

Lafrance et al., 2019

## SEARCH STRATEGY

### Medline

Search date : 2018/04/12

All Ovid MEDLINE(R) 1946 to Present

1. SHOULDER/
2. Humeral Head/
3. Shoulder Joint/
4. Acromion/
5. Rotator Cuff/
6. 1 or 2 or 3 or 4 or 5
7. Shoulder Impingement Syndrome/
8. Shoulder pain/
9. Shoulder injury/
10. Tendinopathy/
11. Calcinosis/
12. CALCIFICATION, PHYSIOLOGIC/
13. Bursitis/
14. 7 or 8 or 9 or 10 or 11 or 12 or 13
15. Therapeutic Irrigation/
16. Needle/
17. Lavage/
18. 14 or 15 or 16 or 17
19. 6 and 14 and 18
20. shoulder.mp.
21. (humeral head or glenohumeral or gleno-humeral).mp.
22. acromion.mp.
23. (Supraspinatus or Infraspinatus or Subscapularis or Teres minor).mp.
24. subacromial.mp.
25. rotator cuff.mp.
26. 20 or 21 or 22 or 23 or 24 or 25
27. shoulder impingement syndrome.mp.
28. (tendinitis or tendinosis or tenosynovitis).mp.
29. tendinopathy.mp.

30. bursitis.mp.
31. (calcific or calcified or calcium or calcium deposit or calcinosis or calcifying or calcification).mp.
32. 27 or 28 or 29 or 30 or 31
33. therapeutic irrigation.mp.
34. aspiration.mp.
35. irrigation.mp.
36. needle.mp.
37. needling.mp.
38. barbotage.mp.
39. lavage.mp.
40. puncture.mp.
41. 33 or 34 or 35 or 36 or 37 or 38 or 39 or 40
42. 26 and 32 and 41
43. 19 or 42
44. limit 43 to (humans and (english or french))
45. limit 44 to "all adult (19 plus years)"

Total: 2802 articles

## EMBASE

Search date : 2018/04/12

Embase 1974 to 2018 April 11

1. SHOULDER/
2. Humeral Head/
3. Shoulder Joint/
4. Acromion/
5. Rotator Cuff/
6. 1 or 2 or 3 or 4 or 5
7. Shoulder Impingement Syndrome/
8. Shoulder pain/
9. Shoulder injury/
10. Tendinopathy/
11. Calcinosis/
12. CALCIFICATION, PHYSIOLOGIC/
13. Bursitis/
14. 7 or 8 or 9 or 10 or 11 or 12 or 13
15. Therapeutic Irrigation/
16. Needle/
17. Lavage/
18. 14 or 15 or 16 or 17
19. 6 and 14 and 18
20. shoulder.mp.
21. (humeral head or glenohumeral or gleno-humeral).mp.
22. acromion.mp.

23. (Supraspinatus or Infraspinatus or Subscapularis or Teres minor).mp.
24. subacromial.mp.
25. rotator cuff.mp.
26. 20 or 21 or 22 or 23 or 24 or 25
27. shoulder impingement syndrome.mp.
28. (tendinitis or tendinosis or tenosynovitis).mp.
29. tendinopathy.mp.
30. bursitis.mp.
31. (calcific or calcified or calcium or calcium deposit or calcinosis or calcifying or calcification).mp.
32. 27 or 28 or 29 or 30 or 31
33. therapeutic irrigation.mp.
34. aspiration.mp.
35. irrigation.mp.
36. needle.mp.
37. needling.mp.
38. barbotage.mp.
39. lavage.mp.
40. puncture.mp.
41. 33 or 34 or 35 or 36 or 37 or 38 or 39 or 40
42. 26 and 32 and 41
43. 19 or 42
44. limit 43 to (humans and (english or french))
45. limit 44 to (adult <18 to 64 years> or aged <65+ years>)

Total: 1908 articles

## CINAHL

Search date : 2018/04/12

S1: (MH "Shoulder") OR (MH "Shoulder Joint") OR (MH "Glenohumeral Joint") or (MH "Acromion") or (MH "Rotator Cuff") or (MH "Supraspinatus Muscles")

S2: (MH "Shoulder Impingement Syndrome") OR (MH "Shoulder Pain") OR (MH "Shoulder Injuries") or (MH "Tendinopathy") OR (MH "Biceps Tendonitis") OR (MH "Calcific Tendinitis") OR (MH "Bursitis") OR (MH "Calcinosis")

S3: (MH "Therapeutic Irrigation") OR (MH "Needles") OR (MH "Punctures")

S4: S1 AND S2 AND S3

MON

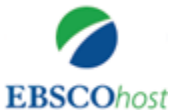

Thursday, April 12, 2018 12:12:49 PM

| #  | Question                                                                                                                                                                                                          | Opérateurs de restriction/Opérateurs d'expansion | Dernière exécution par                                                                                                             | Résultats |
|----|-------------------------------------------------------------------------------------------------------------------------------------------------------------------------------------------------------------------|--------------------------------------------------|------------------------------------------------------------------------------------------------------------------------------------|-----------|
| S4 | S1 AND S2 AND S3                                                                                                                                                                                                  | Modes de recherche - Booléen/Phrase              | Interface - EBSCOhost Research Databases<br>Ecran de recherche - Recherche avancée<br>Base de données - CINAHL Plus with Full Text | 31        |
| S3 | (MH "Therapeutic Irrigation") OR (MH "Needles") OR (MH "Punctures")                                                                                                                                               | Modes de recherche - Booléen/Phrase              | Interface - EBSCOhost Research Databases<br>Ecran de recherche - Recherche avancée<br>Base de données - CINAHL Plus with Full Text | 7,690     |
| S2 | (MH "Shoulder Impingement Syndrome") OR (MH "Shoulder Pain") OR (MH "Shoulder Injuries") or (MH "Tendinopathy") OR (MH "Biceps Tendonitis") OR (MH "Calcific Tendinitis") OR (MH "Bursitis") OR (MH "Calcinosis") | Modes de recherche - Booléen/Phrase              | Interface - EBSCOhost Research Databases<br>Ecran de recherche - Recherche avancée<br>Base de données - CINAHL Plus with Full Text | 12,643    |
| S1 | (MH "Shoulder") OR (MH "Shoulder Joint") OR (MH "Glenohumeral Joint") or (MH "Acromion") or (MH "Rotator Cuff") or (MH "Supraspinatus Muscles")                                                                   | Modes de recherche - Booléen/Phrase              | Interface - EBSCOhost Research Databases<br>Ecran de recherche - Recherche avancée<br>Base de données - CINAHL Plus with Full Text | 10,622    |

## Cochrane Central

Search date : 2018/05/06

EBM Reviews - Cochrane Central Register of Controlled Trials March 2018

1. SHOULDER/
2. Humeral Head/
3. Shoulder Joint/
4. Acromion/

5. Rotator Cuff/
6. 1 or 2 or 3 or 4 or 5
7. Shoulder Impingement Syndrome/
8. Shoulder pain/
9. Shoulder injury/
10. Tendinopathy/
11. Calcinosis/
12. CALCIFICATION, PHYSIOLOGIC/
13. Bursitis/
14. 7 or 8 or 9 or 10 or 11 or 12 or 13
15. Therapeutic Irrigation/
16. Needle/
17. Lavage/
18. 14 or 15 or 16 or 17
19. 6 and 14 and 18
20. shoulder.mp.
21. (humeral head or glenohumeral or gleno-humeral).mp.
22. acromion.mp.
23. (Supraspinatus or Infraspinatus or Subscapularis or Teres minor).mp.
24. subacromial.mp.
25. rotator cuff.mp.
26. 20 or 21 or 22 or 23 or 24 or 25
27. shoulder impingement syndrome.mp.
28. (tendinitis or tendinosis or tenosynovitis).mp.
29. tendinopathy.mp.
30. bursitis.mp.
31. (calcific or calcified or calcium or calcium deposit or calcinosis or calcifying or calcification).mp.
32. 27 or 28 or 29 or 30 or 31
33. therapeutic irrigation.mp.
34. aspiration.mp.
35. irrigation.mp.
36. needle.mp.
37. needling.mp.
38. barbotage.mp.
39. lavage.mp.
40. puncture.mp.
  
41. 33 or 34 or 35 or 36 or 37 or 38 or 39 or 40
42. 26 and 32 and 41
43. 19 or 42

351 articles found, 52 new articles

Searches were not limited to publication type.
